# Supplementary material
Source: PubMed Central journal article supplement (PMC4732721)
Supplement: NIHMS698710-supplement-Supplement.pdf [file NIHMS698710-supplement-Supplement.pdf]

## **SUPPLEMENTARY MATERIAL**

### **Optimization of human dendritic cell sample preparation for mass spectrometry-based proteomics studies**

Ying Zhang<sup>1</sup>, Dario Bottinelli<sup>1</sup>, Frédérique Lisacek<sup>2,3</sup>, Jeremy Luban<sup>4</sup>, Caterina Strambio De Castillia<sup>4</sup>, Emmanuel Varesio<sup>1</sup>, Gérard Hopfgartner<sup>1\*</sup>

1. University of Geneva, Life Sciences Mass Spectrometry, School of Pharmaceutical Sciences, Geneva, Switzerland.
2. SIB Swiss Institute of Bioinformatics, Proteome Informatics Group, Geneva, Switzerland.
3. University of Geneva, Faculty of Sciences, Geneva, Switzerland
4. University of Massachusetts, Medical School, Program in Molecular Medicine, Worcester, MA, USA.

*\* Corresponding author*

Gérard Hopfgartner

Life Sciences Mass Spectrometry

University of Geneva

Quai Ernest-Ansermet 30

CH-1211 Genève 4

phone: +41-22-379 6344

fax: +41-22-379 3393

email: Gerard.Hopfgartner@unige.ch

## Supplementary Figures

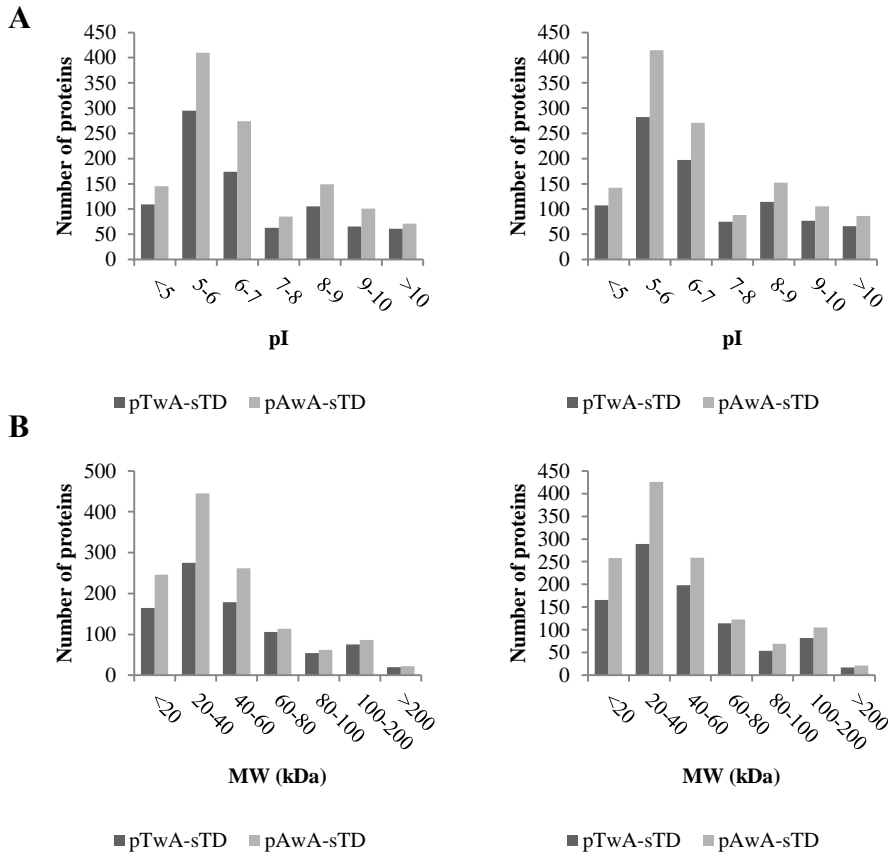

**Figure S1.** Comparative study of the proteins identified by the workflows using different protein precipitation methods for Triton X-100 cell lysate (Left) and RIPA cell lysate (Right). Data were obtained by merging two experimental replicates for each workflow. pAwA: Acetone precipitation plus acetone-wash step; pTWA: 10% TCA/acetone precipitation method. *The precipitated proteins were then re-solubilised by 1% Na-DIC in 0.5 M TEAB dissolution buffer (sTD).* (A) Calculated isoelectric point (pI); (B) Average molecular weight (MW).

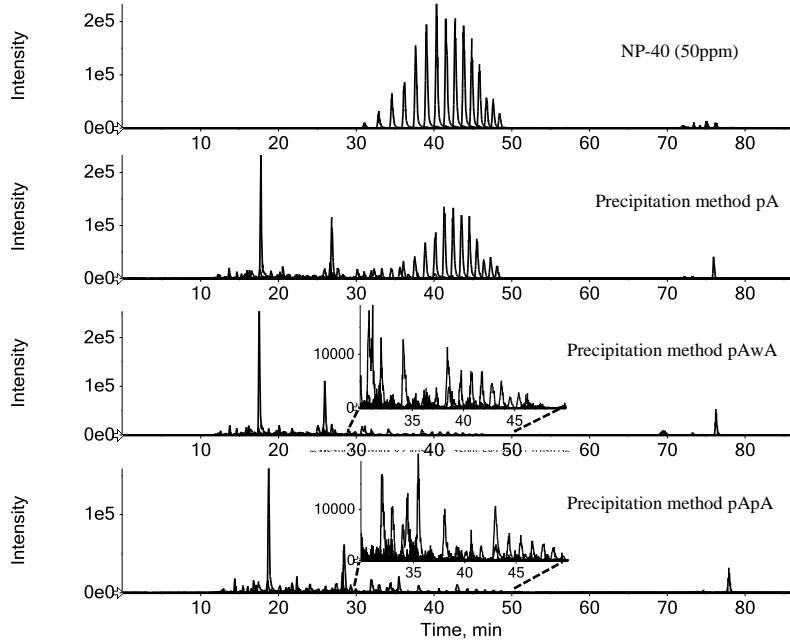

**Figure S2.** Extracted ion chromatograms (XICs) of the representative ions derived from the detergent residue in the protein extract by RIPA buffer after different acetone precipitation treatments (*the precipitated protein pellets were then re-solubilized by 1% Na-DOC in 0.5M TEAB dissolution buffer*). From top to bottom: NP-40 at 50 ppm; single precipitation by acetone (pA); acetone precipitation plus acetone-wash step (pAwA); double precipitation by acetone (pApA).

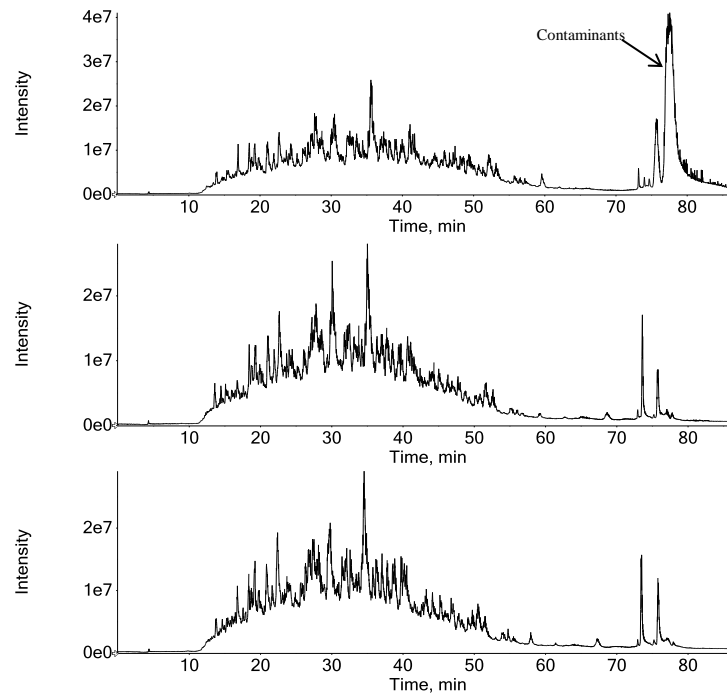

**Figure S3.** Typical TIC traces of tryptic digest of MDDC protein extract prepared by the workflows with three protein precipitation methods: (top) single precipitation by acetone (pA); (middle) acetone precipitation plus acetone-wash step (pAwA); (bottom) double precipitation by acetone (pApA).

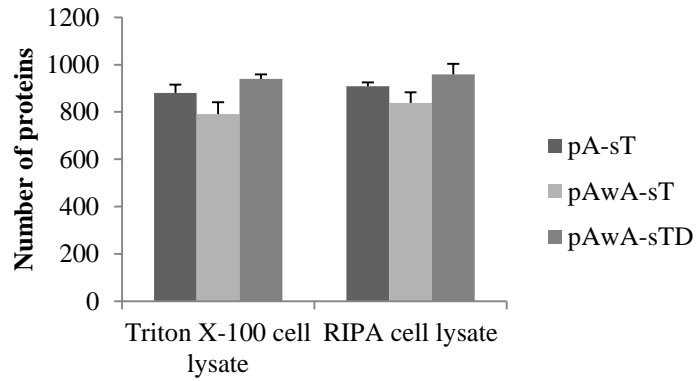

**Figure S4.** Number of MDDC proteins identified by different sample preparation workflows from Triton X-100 cell lysate and RIPA cell lysate. Data were derived from four experimental replicates and are presented as the mean  $\pm$  SD. pA: MDDC proteins were precipitated by acetone; pAwA: MDDC proteins were precipitated by acetone, followed by the acetone-wash step; sT: The precipitated proteins were re-solubilised in 0.5 M TEAB; sTD: The precipitated proteins were re-solubilised in 0.5 M TEAB containing 1% Na-DOC.

## Supplementary Tables

**Table S1.** Summary of the LC-MS/MS analysis results of the tryptic digests prepared by different sample preparation workflows for MDDC Triton X-100 cell lysate and RIPA cell lysate. Data reported here are the average results of two experimental replicates for each of the ten different workflows (two technical replicates of each experimental replicate were merged). Identification FDR threshold for MS/MS spectra is 5% (local FDR), for distinct peptides is 5% (local FDR) and for proteins is 1% (global FDR). Only those distinct peptides which are associated with the confidently identified proteins are considered.

| Cell lysate        | Sample preparation workflow (n=2) | MS/MS spectra |            |                 | Distinct peptides |               |                    |                 |     | Protein |
|--------------------|-----------------------------------|---------------|------------|-----------------|-------------------|---------------|--------------------|-----------------|-----|---------|
|                    |                                   | Total         | Identified | % of identified | Total             | Fully cleaved | % of fully cleaved | Missed cleavage |     |         |
|                    |                                   |               |            |                 |                   |               |                    | 1               | ≥2  |         |
| Triton X-100 (TCL) | pA-sT                             | 54483         | 26867      | 49.3            | 5380              | 5138          | 95.5               | 234             | 9   | 856     |
|                    | pA-sTS                            | 58535         | 23129      | 39.5            | 4302              | 4142          | 96.3               | 155             | 5   | 729     |
|                    | pA-sTD                            | 50172         | 24553      | 48.9            | 5830              | 5570          | 95.5               | 252             | 8   | 946     |
|                    | pAwA-sT                           | 43038         | 21079      | 49.0            | 4995              | 4886          | 97.8               | 107             | 3   | 787     |
|                    | pAwA-sTS                          | 52748         | 17123      | 32.5            | 3583              | 3494          | 97.5               | 88              | 2   | 646     |
|                    | pAwA-sTD                          | 42775         | 23275      | 54.4            | 5706              | 5479          | 96.0               | 222             | 6   | 948     |
|                    | pTwA-sT                           | 38787         | 15231      | 39.3            | 3726              | 3637          | 97.6               | 87              | 3   | 597     |
|                    | pTwA-sTS                          | 56482         | 16761      | 29.7            | 3005              | 2935          | 97.7               | 70              | 1   | 506     |
|                    | pTwA-sTD                          | 37345         | 17022      | 45.6            | 4085              | 3971          | 97.2               | 111             | 3   | 666     |
| pApA-sTD           | 45694                             | 26053         | 57.0       | 5643            | 5359              | 95.0          | 278                | 6               | 929 |         |
| RIPA (RCL)         | pA-sT                             | 52845         | 28093      | 53.2            | 5521              | 5273          | 95.5               | 238             | 11  | 893     |
|                    | pA-sTS                            | 55672         | 24867      | 44.7            | 4239              | 4105          | 96.8               | 132             | 2   | 759     |
|                    | pA-sTD                            | 45380         | 24702      | 54.4            | 5721              | 5479          | 95.8               | 233             | 9   | 925     |
|                    | pAwA-sT                           | 42999         | 22521      | 52.4            | 5537              | 5395          | 97.4               | 138             | 5   | 865     |
|                    | pAwA-sTS                          | 46476         | 19697      | 42.4            | 4006              | 3888          | 97.1               | 117             | 1   | 757     |
|                    | pAwA-sTD                          | 43788         | 25677      | 58.6            | 5837              | 5606          | 96.0               | 223             | 8   | 1000    |
|                    | pTwA-sT                           | 39285         | 16384      | 41.7            | 3674              | 3585          | 97.6               | 87              | 3   | 618     |
|                    | pTwA-sTS                          | 54335         | 17533      | 32.3            | 3078              | 2992          | 97.2               | 86              | 1   | 542     |
|                    | pTwA-sTD                          | 36514         | 17515      | 48.0            | 4227              | 4096          | 96.9               | 125             | 7   | 711     |
| pApA-sTD           | 46244                             | 26521         | 57.4       | 5645            | 5330              | 94.4          | 304                | 11              | 897 |         |

**Table S2.** Numbers of proteins grouped by different GRAVY index values which were identified by two different protein precipitation methods. Data were obtained by merging two experimental replicates for each workflow. pAwA: acetone precipitation plus the acetone-wash step; pTWA: 10% TCA/acetone precipitation method. *The precipitated proteins were then re-solubilised by 1% Na-DOC in 0.5 M TEAB dissolution buffer (sTD).*

| GRAVY index | Triton X-100 cell lysate (TCL) |          |              | RIPA cell lysate (RCL) |          |              |
|-------------|--------------------------------|----------|--------------|------------------------|----------|--------------|
|             | pTWA-sTD                       | pAwA-sTD | Increase (%) | pTWA-sTD               | pAwA-sTD | Increase (%) |
| -2 - -1.5   | 9                              | 9        | 0            | 11                     | 12       | 9            |
| -1.5 - -1   | 37                             | 48       | 30           | 47                     | 52       | 11           |
| -1 - -0.5   | 215                            | 300      | 40           | 235                    | 321      | 37           |
| -0.5 - 0    | 446                            | 651      | 46           | 458                    | 654      | 43           |
| 0 - 0.5     | 61                             | 108      | 77           | 61                     | 101      | 66           |
| 0.5 - 1     | 7                              | 13       | 86           | 6                      | 10       | 67           |
| 1 - 1.5     | 0                              | 0        | -            | 0                      | 1        | -            |

**Table S3.** Peak areas of the XIC traces of the representative ions observed from Triton X-100 buffer, RIPA buffer and their residues remaining in the MDDC protein extract after being treated by three different acetone precipitation methods. Data were obtained by averaging two experimental replicates for each workflow with two technical replicates per experimental replicate. pA: acetone precipitation; pAwA: acetone precipitation plus the acetone-wash step; pApA: double-precipitation by acetone. *The precipitated proteins were then re-solubilised by 1% Na-DOC in 0.5 M TEAB dissolution buffer (sTD).*

| Triton X-100    |          |          |          |          | RIPA (NP-40)    |          |         |          |          |
|-----------------|----------|----------|----------|----------|-----------------|----------|---------|----------|----------|
| <i>m/z</i> (++) | 50ppm    | pA-sTD   | pAwA-sTD | pApA-sTD | <i>m/z</i> (++) | 50ppm    | pA-sTD  | pAwA-sTD | pApA-sTD |
| 296.19          | 732560   | 100057   | -        | -        | 274.17          | 165167   | -       | -        | -        |
| 318.20          | 1503534  | 320703   | 14689    | 17554    | 296.19          | 555884   | 46772   | -        | 4854     |
| 340.21          | 2111351  | 754330   | 25333    | 24582    | 318.20          | 1152534  | 161482  | 9967     | 14021    |
| 362.23          | 3674198  | 956854   | 27210    | 27775    | 340.21          | 1635755  | 308101  | 15841    | 26489    |
| 384.24          | 5045737  | 1737717  | 51972    | 54704    | 362.23          | 2739321  | 554260  | 24743    | 32970    |
| 406.25          | 5424502  | 2384762  | 64266    | 70186    | 384.24          | 3666326  | 945256  | 47953    | 52585    |
| 428.26          | 5681518  | 2932911  | 83963    | 82910    | 406.25          | 4333855  | 1294866 | 59851    | 75319    |
| 450.27          | 5284732  | 2886622  | 83167    | 85789    | 428.27          | 3536062  | 948830  | 53310    | 71231    |
| 472.29          | 5162440  | 2771621  | 85663    | 85758    | 450.28          | 3947707  | 1178320 | 64596    | 81251    |
| 494.30          | 4725412  | 2628696  | 117922   | 84982    | 472.29          | 4032656  | 1300557 | 91270    | 92758    |
| 516.31          | 3533110  | 2023048  | 77083    | 67290    | 494.31          | 2414603  | 916177  | 66624    | 54903    |
| 538.32          | 2350792  | 1376533  | 62759    | 45346    | 516.32          | 2252307  | 836132  | 69585    | 63326    |
| 560.34          | 1504752  | 964650   | 50406    | 36909    | 546.85          | 879493   | 313827  | 25534    | 20645    |
| 582.35          | 856813   | 608179   | 42485    | 21037    | 560.34          | 1071945  | 449136  | 45437    | 36975    |
| 604.36          | 418828   | 348046   | 22872    | 12293    | 582.36          | 450327   | 251652  | 24263    | 21183    |
| 626.37          | 181229   | 171773   | 12176    | 8353     | -               | -        | -       | -        | -        |
| <b>Sum</b>      | 48191508 | 22966502 | 821967   | 725469   | <b>Sum</b>      | 32833941 | 9505365 | 598972   | 648512   |

**Table S4.** Numbers of hydrophilic proteins (GRAVY negative index) and hydrophobic proteins (GRAVY positive index) detected by the sample preparation workflows using the acetone precipitation method without (pA) or with (pAwA) the acetone-wash step. Data were obtained by averaging four experimental replicates for each workflow. *The precipitated proteins were then re-solubilised by 0.5 M TEAB dissolution buffer (sT).*

| Sample                         | Workflow | GRAVY Negative | Decrease (%) | GRAVY Positive | Decrease (%) |
|--------------------------------|----------|----------------|--------------|----------------|--------------|
| Triton X-100 cell lysate (n=4) | pA-sT    | 798            | 9.4          | 82             | 16.8         |
|                                | pAwA-sT  | 723            |              | 68             |              |
| RIPA cell lysate (n=4)         | pA-sT    | 823            | 6.8          | 85             | 17.1         |
|                                | pAwA-sT  | 767            |              | 71             |              |
| <b>Average</b>                 |          | -              | <b>8</b>     | -              | <b>17</b>    |

**Table S5.** Numbers of hydrophilic proteins (GRAVY negative index) and hydrophobic proteins (GRAVY positive index) detected by the sample preparation workflows using the acetone with wash precipitation (pAwA) method and the precipitated protein pellet was then re-solubilised by the 0.5M TEAB dissolution buffer in the absence (sT) or presence (sTD) of 1% Na-DOC. Data were obtained by averaging four experimental replicates for each workflow.

| Sample                         | Workflow | GRAVY Negative | Increase (%) | GRAVY Positive | Increase (%) |
|--------------------------------|----------|----------------|--------------|----------------|--------------|
| Triton X-100 cell lysate (n=4) | pAwA-sT  | 723            | 15.8         | 68             | 36.3         |
|                                | pAwA-sTD | 838            |              | 93             |              |
| RIPA cell lysate (n=4)         | pAwA-sT  | 767            | 12.9         | 70.5           | 31.6         |
|                                | pAwA-sTD | 867            |              | 93             |              |
| <b>Average</b>                 |          | -              | <b>14</b>    | -              | <b>34</b>    |
